# Supplementary material for: Effect of Statin Therapy on Outcomes of Patients With Acute Ischemic Stroke and Atrial Fibrillation
Source: PubMed Central journal article supplement — J Am Heart Assoc. 2019 Dec 12;8(24):e013941. doi: 10.1161/JAHA.119.013941 (PMC6951051; doi:10.1161/jaha.119.013941), 2019-12-12
Supplement: JAH3-8-e013941-s001.pdf [file JAH3-8-e013941-s001.pdf]

# **SUPPLEMENTAL MATERIAL**

**Table S1. Event rates and association estimates from Cox proportional hazards modeling according to statin intensity.**

| Clinical outcomes                        | No statin<br>(n=574) | Statin groups (vs No statin group) |                                |                      | HI group (vs LMI)              |                                |
|------------------------------------------|----------------------|------------------------------------|--------------------------------|----------------------|--------------------------------|--------------------------------|
|                                          |                      | LMI statin<br>(n=1,013)            | HR (95% CI);<br><i>p</i> value | HI statin<br>(n=566) | HR (95% CI);<br><i>p</i> value | HR (95% CI);<br><i>p</i> value |
| <b>Primary outcome</b>                   |                      |                                    |                                |                      |                                |                                |
| Net adverse clinical and cerebral events |                      |                                    | 0.65 (0.53–0.78);<br><0.001    |                      | 0.49 (0.38–0.63);<br><0.001    | 0.75 (0.59–0.96);<br>0.021     |
| Number of events                         | 185                  | 232                                |                                | 97                   |                                |                                |
| Incidence per 100 person-years           | 24.56                | 15.52                              |                                | 11.92                |                                |                                |
| <b>Secondary outcomes</b>                |                      |                                    |                                |                      |                                |                                |
| Death from any cause                     |                      |                                    | 0.59 (0.47–0.73);<br><0.001    |                      | 0.43 (0.32–0.58);<br><0.001    | 0.73 (0.55–0.97);<br>0.034     |
| Number of events                         | 149                  | 167                                |                                | 68                   |                                |                                |
| Incidence per 100 person-years           | 18.44                | 10.59                              |                                | 7.95                 |                                |                                |
| Any stroke                               |                      |                                    | 0.88 (0.61–1.27);<br>0.506     |                      | 0.73 (0.47–1.14);<br>0.169     | 0.83 (0.55–1.23);<br>0.364     |
| Number of events                         | 45                   | 77                                 |                                | 35                   |                                |                                |
| Incidence per 100 person-years           | 5.86                 | 5.13                               |                                | 4.27                 |                                |                                |
| Recurrent ischemic stroke                |                      |                                    | 0.89 (0.59–1.35);<br>0.899     |                      | 0.71 (0.43–1.17);<br>0.180     | 0.79 (0.50–1.24);<br>0.308     |
| Number of events                         | 36                   | 63                                 |                                | 27                   |                                |                                |
| Incidence per 100 person-years           | 4.65                 | 4.17                               |                                | 3.29                 |                                |                                |
| Intracranial hemorrhage                  |                      |                                    | 1.66 (0.70–3.88);<br>0.243     |                      | 1.37 (0.52–3.60);<br>0.522     | 0.82 (0.39–1.75);<br>0.624     |
| Number of events                         | 7                    | 22                                 |                                | 10                   |                                |                                |
| Incidence per 100 person-years           | 0.87                 | 1.42                               |                                | 1.19                 |                                |                                |
| Acute coronary syndrome                  |                      |                                    | 1.06 (0.57–1.95);<br>0.852     |                      | 0.88 (0.42–1.83);<br>0.740     | 0.83 (0.44–1.56);<br>0.568     |
| Number of events                         | 15                   | 31                                 |                                | 14                   |                                |                                |
| Incidence per 100 person-years           | 1.89                 | 2.01                               |                                | 1.68                 |                                |                                |
| Major bleeding                           |                      |                                    | 0.24 (0.10–0.60);<br>0.002     |                      | 0.45 (0.18–1.10);<br>0.081     | 1.82 (0.64–5.20);<br>0.260     |
| Number of events                         | 15                   | 7                                  |                                | 7                    |                                |                                |
| Incidence per 100 person-years           | 1.88                 | 0.45                               |                                | 0.83                 |                                |                                |

LMI = low to moderate intensity; HR = hazard ratio; CI = confidence interval; HI = high intensity.

**Figure S1. Study population enrollment flow.**

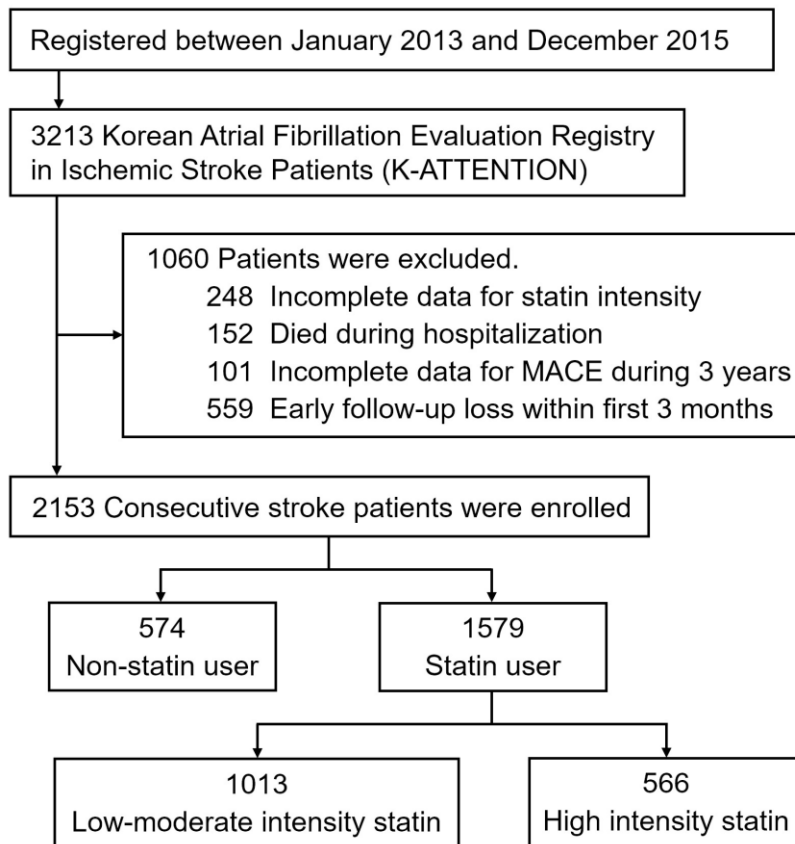

MACE = major adverse cerebro/cardiovascular events.
